# Supplementary material for: Effect of the inclusion of sodium cations on the binding properties of a switchable diporphyrin receptor
Source: Royal Society of Chemistry journal article supplement (doi:10.1039/b102904p), 2001-01-01
Supplement: b102904p.doc [file b102904p.doc]

Letter to: *New Journal of Chemistry*

Supplementary Material.

**Effect of the inclusion of sodium cation on the binding properties of a switchable diporphyrin receptor.**

Donato Monti,*a Laura La Monica,a Anita Scipioni,b and Giovanna Mancini.c

1. Dipartimento di Scienze e Tecnologie Chimiche, Università di Roma “Tor Vergata”, via della Ricerca Scientifica s.n.c., I-00133 Rome, Italy.
2. Dipartimento di Chimica, Università di Roma “La Sapienza”, Ple. Aldo Moro 3, I-00185 Rome, Italy.
3. Centro C.N.R. di Studio sui Meccanismi di Reazione, Dipartimento di Chimica, Università di Roma “La Sapienza”, Ple. Aldo Moro 3, I-00185 Rome, Italy.

Keywords: CD spectroscopy, host-guest chemistry, podands, porphyrinoids, supramolecular chemistry.

*) Corresponding Author: phone: +39 06 7259 4738

fax: +39 06 7259 4328

E-mail: monti@stc.uniroma2.it

Supplementary material.

*Instrumentation*: 1H-NMR spectra were recorded with a Bruker AC 300 P (300 MHz) spectrometer. Chemical shifts are given in ppm relative to tetramethylsilane (TMS). UV-visible spectra were measured on a Perkin Elmer 18 Spectrophotometer equipped with a termostatted cell holder. CD spectra were recorded on a JASCO J‑715 Spectropolarimeter and reported as [nm]/[L mol-1 cm-1]. Mass spectra (FAB) were recorded on a VG Quattro Spectrometer using *m*‑nitrobenzyl alcohol (NBA, Aldrich) as a matrix in positive ion mode.

*Materials*: Silica gel 60 (70-230 mesh) was used for column chromatography. Reagents (Aldrich, Merck or Fluka) were of the highest grade available and were used without further purification. Sodium perchlorate (Anhydrous, Aldrich) was additionally vacuum dried, and stored under a dry atmosphere. Solvents were dried, distilled and degassed prior to use, by using standard procedures.S1 Solvents used for spectrophotometric measurements, acetonitrile and chloroform Uvasol (Merck), were stored over activated molecular sieves.

*UV-visible spectroscopic titration*: a typical procedure is as follows: aliquots of titrating solution (1x10‑2÷1x10-4 M), prepared by dissolving the required amount of the guests in a freshly prepared stock solution of the free receptor **1Zn** (1-5x10-5 M), were added, portionwise *via* microsyringe, to a 2.5 mL of the **1Zn** stock solution (1 cm quartz cell, 25.0 °C). The absorbance variation (Q band, 556 nm) was monitored at different concentration of added guest. The binding constants (*K*) were calculated by using a standard equation for a 1:1 complexation: A=[**1Zn**]*K*[**G**]/(1+*K*[**G**]), where A=A0-Ai; =e0-e∞; [**G**] is the concentration of the added guest. The computer aided non‑linear least square fitting analyses, to give *K* and  valueshave been performed with the program Kaleidagraph® (version 3.0.4 by Abelbeck Software, Synergy Software, Reading PA 19606, USA). The experiments have run in duplicate and are reproducible within the range of 2÷5%.

*Preparations*. The free-base porphyrin precursors **1** and **2** were prepared according to published procedures.S2 Syntheses of porphyrin derivatives **1Zn** and **2Zn** have been accomplished by standard metalation proceduresS3 of **1** and **2**, respectively.

**Zinc[5-(4-hydroxy-3-methoxyphenyl)-10,15,20-triphenyl-porphyrinatoyl], 2Zn**: In a 50 mL round bottomed flask, equipped with a reflux condenser, a solution of 100 mg of **2** ( 0.15 mmol) in 25 mL of chloroform was placed. The reaction mixture was brought to reflux temperature and an excess (2.5 mL) of a saturated zinc acetate methanolic solution was added. The progress of the reaction was monitored by UV-visible spectroscopy (Soret and Q visible bands changes). After 2 hours, the mixture was cooled to room temperature and the solvent removed in vacuo (rotary evaporator) to give a cherry-purple solid which was dissolved in 50 mL of dichloromethane and washed (3x50 mL) with brine. The organic phase was dried (Na2SO4), the solved stripped off under reduced pressure and the residue, constituted by virtually pure **2Zn**, was further crystallised from a CH2Cl2/hexane mixture, to give 95 mg (0.13 mmol, 87% yield) of the title product as bright cherry-purple crystals.

**1,11‑Bis[zinc(2-methoxy-4-(10,15,20-triphenyl-5-porphyrinatoyl)-phenoxy)]-3,6,9-trioxaundecane**, **1Zn**: The synthesis has been carried out by following the procedure employed for the preparation of **2Zn**. Starting from 0.18 g (0.126 mmol) of **1**, 0.160 g (0.10 mmol, 84% yield) of **1Zn** were obtained, as a bright purple crystalline solid.

References

S1) D.D. Perrin, W.L.F. Armarego and D.E. Perrin in *Purification of Laboratory Chemicals*, 2nd ed., Pergamon Press, New York, 1980.

S2) L. La Monica, D. Monti, G. Mancini, M. Montalti,L. Prodi, N. Zaccheroni,G. D’Arcangelo and R. Paolesse, *N. J. Chem*. 2001, **25**, 597.

S3) P. Bhyrappa and V. Krishnan, *Inorg*. *Chem*. 1991, **30**, 239.
